# Supplementary material
Source: PubMed Central journal article supplement (PMC3556236)
Supplement: NIHMS430609-supplement-01.pdf [file NIHMS430609-supplement-01.pdf]

## Supplemental Data

### *Assessment of subcytolytic concentration of NE on TC-1 cells*

Cell survival rate and cytotoxicity were measured using the XTT and LDH assays, respectively. Briefly, TC-1 cells ( $1 \times 10^4$  cells) in 100  $\mu$ L of RPMI 1640 were added to wells of a 96-well plate and incubated overnight. The next day, the cells were treated with increasing concentrations of  $W_{80}5EC$  and incubated for an additional 24 hours before XTT or LDH assays were applied. The optical density of the wells was recorded on an ELISA reader (Spectra Max 340, Molecular Devices, Sunnyvale, CA).

Supplemental Figure 1 shows that the concentrations of  $W_{80}5EC$  nanoemulsion used to investigate the effect of NE on epithelial cells (0.025 and 0.05%) were not cytolytic. Based on these two assays, the sub-cytolytic concentration of NE was assessed (see Supplemental Figure 1). Therefore, in subsequent experiments 0.025% and 0.05% concentrations of NE were used to study the effect of NE on cells.

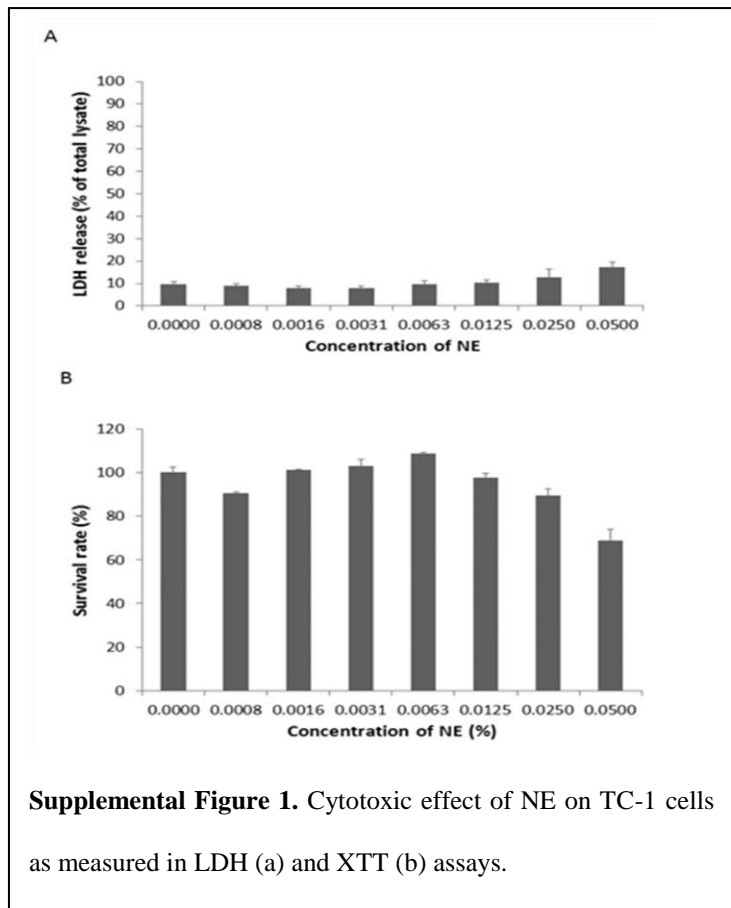

### *$W_{80}5EC$ promotes antigen uptake by BMDs in vitro*

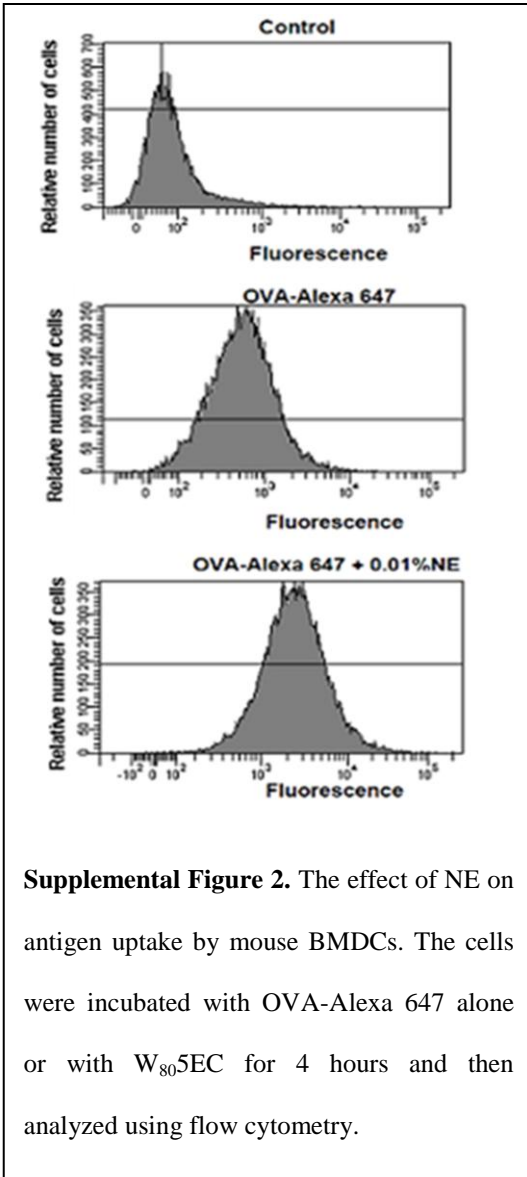

We also assessed whether BMDCs respond to W<sub>80</sub>5EC NE with increased antigen uptake. BMDCs were incubated four hours with OVA-Alexa Fluor 647 (Life Technologies) (5 µg/mL) alone or with 0.01% W<sub>80</sub>5EC, washed and analyzed using flow cytometer. BMDCs treated with W<sub>80</sub>5EC had MFI values 5 times higher than BMDCs treated with OVA-AlexaFluor 647 alone (**Supplemental Figure 2**).

***NE causes cell cycle arrest at G<sub>2</sub>/M phase and apoptosis of TC-1 cells***

Cell-cycle analysis was performed as described previously [1]. Briefly, TC-1 cells (5x10<sup>4</sup> cells/mL) were treated with indicated concentrations of W<sub>80</sub>5EC or staurosporine (Roche Diagnostics GmbH) for the indicated periods of time. After the

treatment cells were fixed in 75% cold ethanol and stored at -20°C. For analysis cells were resuspended in 500 µL of staining solution containing 0.1% (v/v) Triton X-100, 10 µg PI (Roche Diagnostics GmbH), and 100 µg DNase free RNase (Sigma-Aldrich) in PBS, incubated for 40 minutes at 37°C, and analyzed using flow cytometry.

The TC-1 cells were cultured and treated as described for cell cycle analysis. After treatment cells were harvested and stained with annexin V-FITC (BioVison) and PI and analyzed using flow cytometry.

To

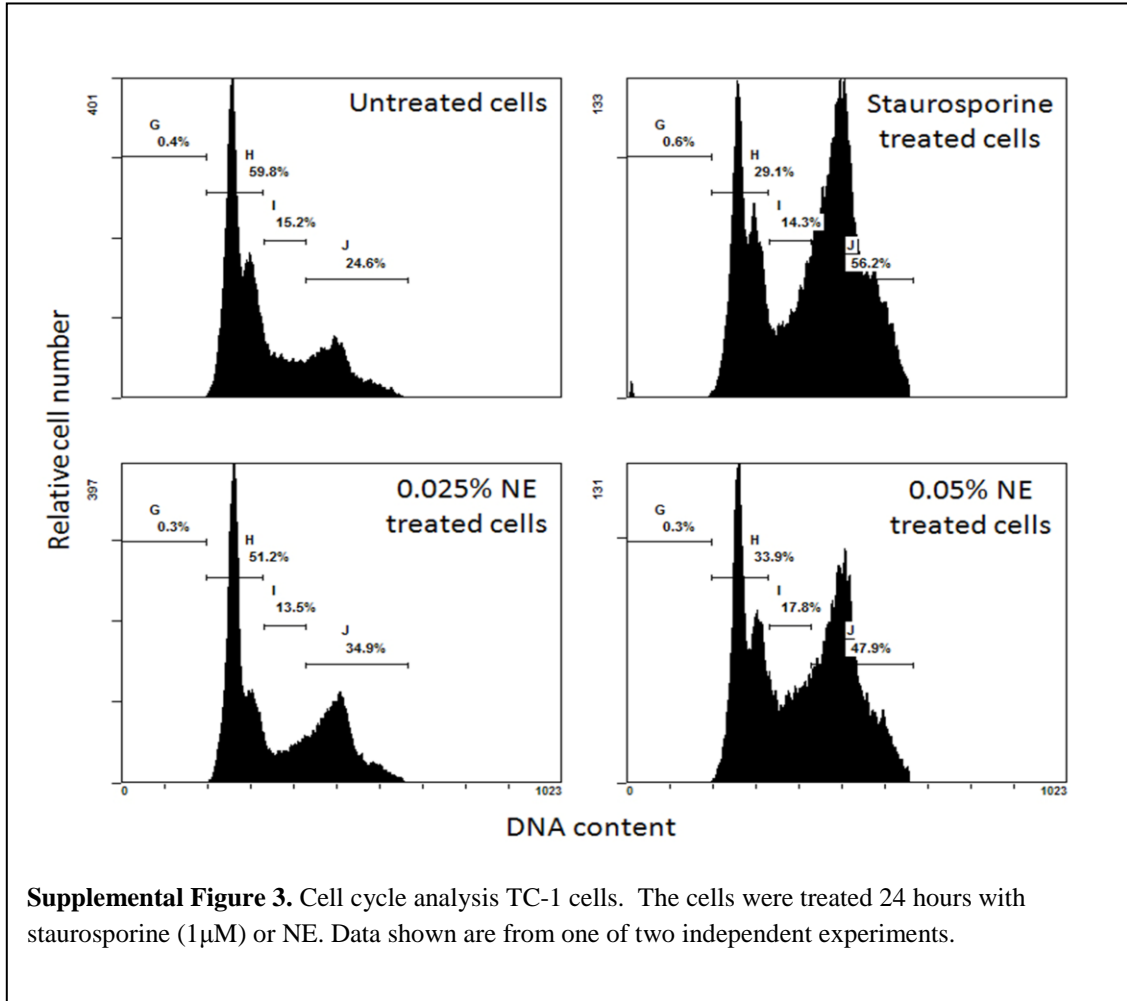

determine whether W<sub>80</sub>5EC could induce cell-cycle aberration, TC-1 cells were treated with W<sub>80</sub>5EC overnight and cell-cycle analysis was performed using flow cytometry. We observed an increase of cells in the G<sub>2</sub>/M phase from 24.6% in untreated cells to 34.9% in cells treated with 0.025% W<sub>80</sub>5EC, and 47.9% in cells treated with 0.05% W<sub>80</sub>5EC (**Supplemental Figure 3A, C, and D**). Treatment of cells with 1  $\mu$ M staurosporine used as a positive control also caused cell-cycle arrest at G<sub>2</sub>/M (**Supplemental Figure 3B**).

To detect apoptosis TC-1 cells were treated with W<sub>80</sub>5EC for 24, 48 and 72 hours, stained with

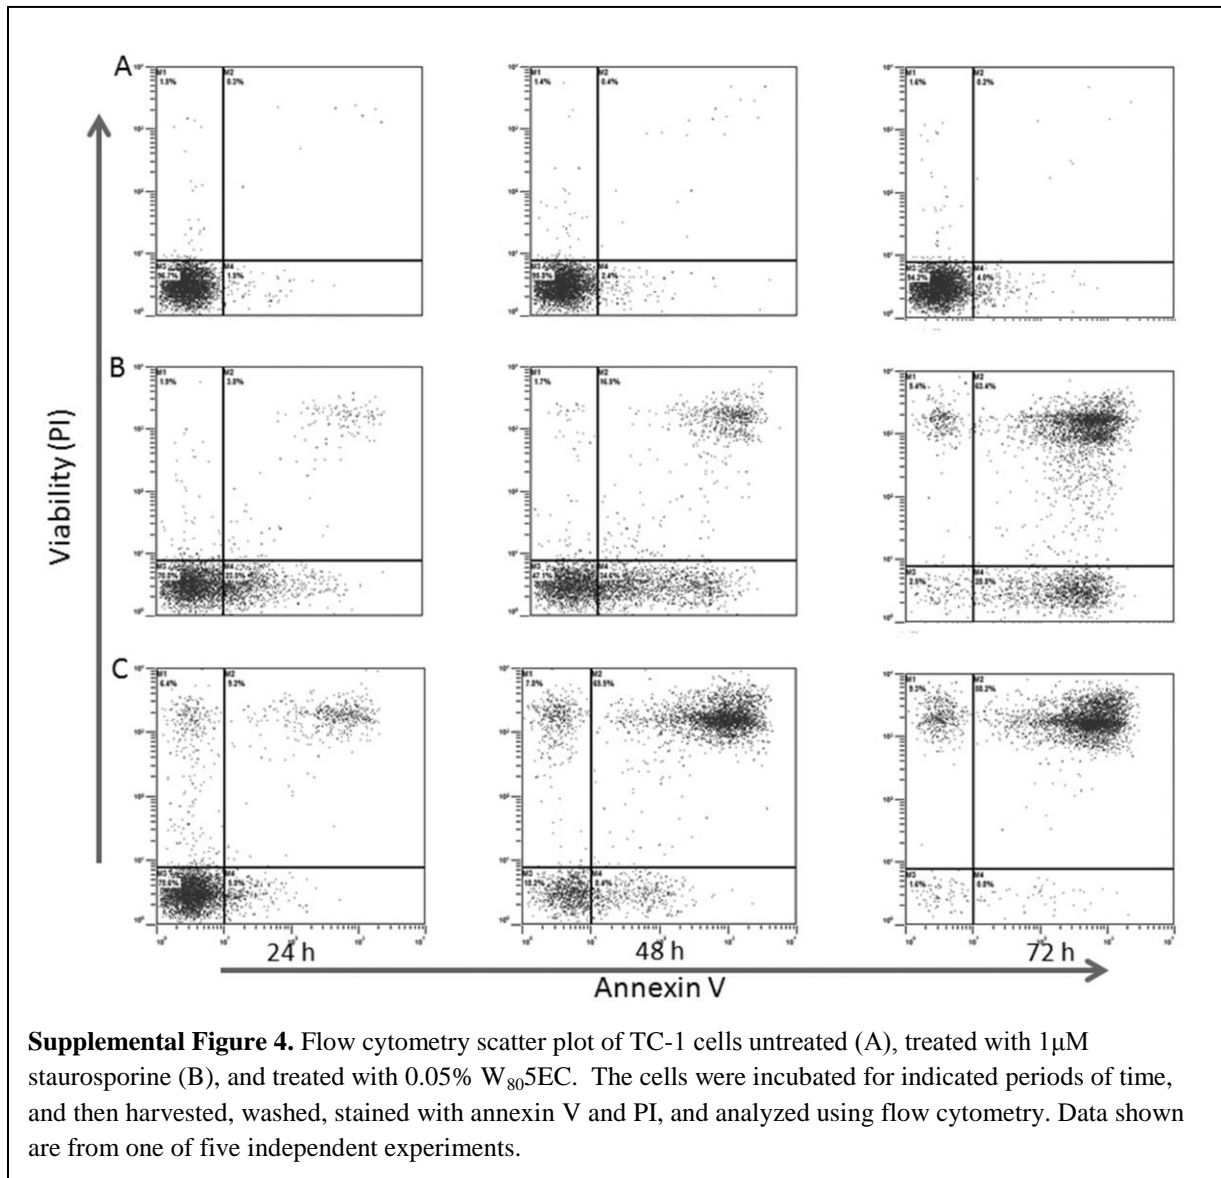

**Supplemental Figure 4.** Flow cytometry scatter plot of TC-1 cells untreated (A), treated with 1 μM staurosporine (B), and treated with 0.05% W<sub>80</sub>5EC. The cells were incubated for indicated periods of time, and then harvested, washed, stained with annexin V and PI, and analyzed using flow cytometry. Data shown are from one of five independent experiments.

annexin V (apoptosis) and PI (necrosis), and analyzed by flow cytometry. Treatment of TC-1

cells with W<sub>80</sub>5EC resulted in approximately 8% early apoptotic cells at 48 hr (annexin V

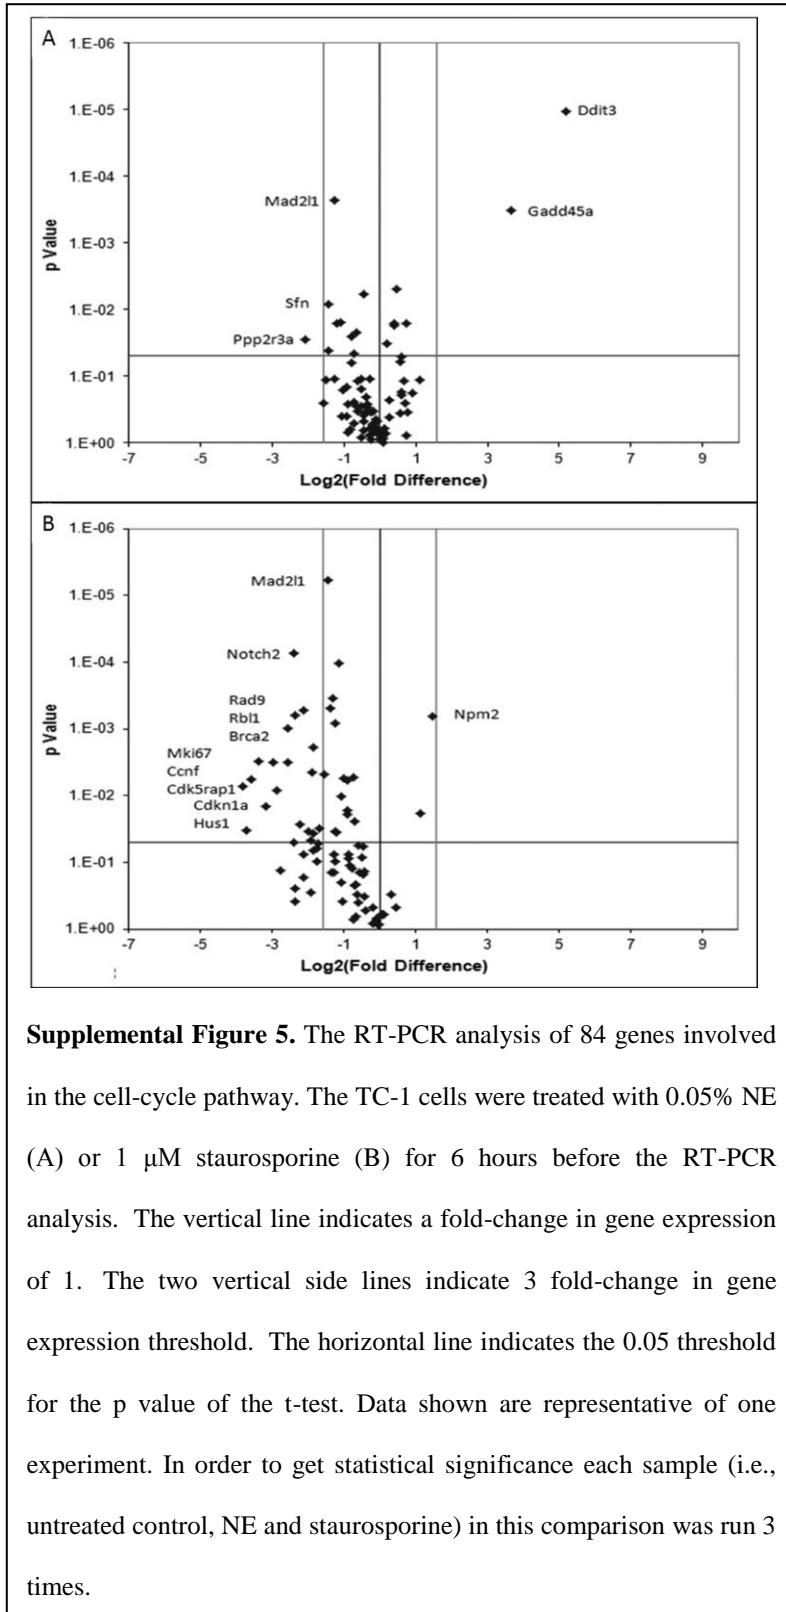

fluorescence alone) and 65% late apoptotic cells (annexin V and PI fluorescence). At 72 hr time point the fraction of late apoptotic cells increased to 88% and at that time point no early apoptotic cells were recorded (**Supplemental Figure 4C**). In contrast, staurosporine-treated cells (**Supplemental Figure 4B**) showed only 16% late apoptotic/necrotic cells, while one third of the cells were early apoptotic after 48-hour treatment. At 72 hours, the fraction of late apoptotic/necrotic cells increased up to 63%. The progression of NE-treated TC-1 cells from early apoptosis to late apoptosis occurs faster than in the cells treated with staurosporine.

### ***RT-PCR analysis of genes involved in cell cycle arrest and apoptosis regulation***

Gene expression analysis was performed with real-time transcription RT-PCR. The mRNA was isolated from TC-1 cells treated with 0.05% W<sub>80</sub>5EC or 1 μM staurosporine for 6 hours and from control cells using RNazol<sup>®</sup>RT, following the protocol from Molecular Research Center, Inc. The analysis was performed using the RT<sup>2</sup> First Strand Kit, RT<sup>2</sup> Profiler<sup>™</sup> PCR Array, and RT<sup>2</sup> SYBR<sup>®</sup> Green qPCR Master Mix from SABiosciences (Qiagen Company). The PCR array was run on an Eppendorf realplex<sup>2</sup> Mastercycler epgradient S. Data analysis was performed using the DDC<sub>t</sub> Method [2]. The fold-change for each gene from the control to the experimental group was calculated as 2<sup>(-DDC<sub>t</sub>)</sup>.

RT-PCR analysis was performed to examine whether W<sub>80</sub>5EC and staurosporine treatments have a similar effect on genes involved in cell-cycle arrest and apoptosis. As shown in **Supplemental Figure 5**, 0.05% W<sub>80</sub>5EC had a significant effect of gene transcription of two genes involved in cell-cycle checkpoints and cell-cycle arrest: Ddit3 (36 fold) and Gadd45a (13 fold) as compared to untreated control cells (**Supplemental Figure 5A**). These genes are members of a group of genes that increase transcript levels following growth arrest conditions or treatment with DNA-damaging agents. In contrast, the pattern of gene expression in cells treated with staurosporine was different. Staurosporine-treated cells showed significant down-regulation of 10 genes: G<sub>1</sub> phase and G<sub>1</sub>/S transition gene - Nfatc1; S phase and DNA replication gene - Mki67; cell-cycle checkpoint and cell-cycle arrest genes - Brca2, Cdk5rap1 and Notch2; regulation of cell-cycle genes - Ccna2, Ccnb1, Ccnf; and negative regulation of the cell-cycle gene – Rbl1. RT-PCR

analysis was also performed to examine whether genes are differentially regulated in apoptotic cells with staurosporine and NE.

**Supplemental Table 1.** Down-regulation of genes involved in apoptosis as measured using RT-PCR. TC-1 cells were treated with either 1µM staurosporine or 0.05% W<sub>80</sub>5EC. The mRNA was isolated and was subjected to real-time reverse transcription PCR .

| Staurosporine    |              |              | Nanoemulsion     |              |              |
|------------------|--------------|--------------|------------------|--------------|--------------|
| Symbol           | Log2(FC)     | p Value      | Symbol           | Log2(FC)     | p Value      |
| <b>Bok</b>       | <b>-5.81</b> | <b>0.017</b> | <b>Bok</b>       | <b>-2.38</b> | <b>0.031</b> |
| <b>Casp6</b>     | <b>-4.21</b> | <b>0.003</b> | <b>Casp6</b>     | <b>-2.09</b> | <b>0.026</b> |
| <b>Tnfrsf11b</b> | <b>-2.02</b> | <b>0.030</b> | <b>Tnfrsf11b</b> | <b>-2.80</b> | <b>0.018</b> |
| Bcl2l1           | -2.76        | 0.003        | Casp14           | -2.71        | 0.012        |
| Bnip3            | -5.33        | 0.020        | Casp8            | -2.09        | 0.045        |
| Bnip3l           | -2.59        | 0.018        | Trp73            | -2.23        | 0.002        |
| Casp1            | -2.49        | 0.022        |                  |              |              |
| Casp4            | -3.89        | 0.026        |                  |              |              |
| Casp7            | -3.37        | 0.003        |                  |              |              |
| Casp9            | -3.66        | 0.013        |                  |              |              |
| Cradd            | -2.90        | 0.012        |                  |              |              |
| Dapk1            | -2.34        | 0.033        |                  |              |              |
| Dffb             | -3.74        | 0.011        |                  |              |              |
| Hells            | -2.69        | 0.038        |                  |              |              |
| Ltbr             | -3.75        | 0.021        |                  |              |              |
| Polb             | -2.57        | 0.033        |                  |              |              |
| Ripk1            | -5.11        | 0.005        |                  |              |              |
| Sphk2            | -2.68        | 0.033        |                  |              |              |
| Tnfrsf1a         | -3.87        | 0.013        |                  |              |              |
| Trp53bp2         | -2.69        | 0.005        |                  |              |              |

RT-PCR analysis was performed to examine gene expression in cells treated with staurosporine and NE. After treatment with staurosporine 20 of 84 measured genes involved

in apoptosis were down-regulated, while cells treated with NE showed only 6 genes down-regulated. Three of the six genes down-regulated by NE were also down-regulated by staurosporine (BCL2-related ovarian killer protein, Caspase 6 and Tumor Necrosis Factor; see Supplemental Table 1).

## References

1. Darzynkiewicz Z: Nucleic Acid Analysis. In: *Current Protocols in Cytometry*. Edited by Robinson J. New York J Wiley & Sons, Inc; 1997.
2. Livak KJ, Schmittgen TD: Analysis of relative gene expression data using real-time quantitative PCR and the 2(-Delta Delta C(T)) Method. *Methods* 2001, 25(4):402-408.
